# Supplementary material for: Enrichment of rare codons at 5' ends of genes is a spandrel caused by evolutionary sequence turnover and does not improve translation
Source: eLife. 2024 Jul 15;12:RP89656. doi: 10.7554/eLife.89656 (PMC11249729; doi:10.7554/eLife.89656)
Supplement: Supplementary file 1. — See attached Excel spreadsheet. [file elife-89656-supp1.xlsx]

## Sheet: Sheet1
Codon	RRT (Ribosome Residence Time)
TAA	0
TAG	0
TGA	0
GTT	0.062467
ATT	0.067033
ACT	0.067083
TTT	0.071297
ACC	0.073503
TCT	0.07458
ATC	0.074846
GTC	0.075517
GCT	0.076613
AAT	0.07668
ATG	0.078151
TTC	0.079172
AAC	0.080496
TTG	0.080708
AAG	0.08339
CAT	0.083615
GAT	0.086695
CAA	0.086748
TGT	0.086773
GCC	0.093609
CTT	0.093832
TCC	0.095021
TAT	0.096747
TTA	0.097749
AGT	0.097878
CGT	0.099486
GAC	0.099869
GGT	0.101585
CTA	0.103979
CAC	0.105735
GTA	0.107105
AGC	0.111125
CCT	0.112565
AAA	0.113379
AGA	0.11347
CAG	0.1143
GAA	0.114649
TCA	0.115831
TAC	0.117816
GTG	0.118914
ACA	0.125373
GAG	0.126647
CCA	0.130246
ACG	0.130888
CTG	0.131009
TCG	0.132189
CTC	0.133993
TGC	0.13413
GCA	0.134964
GGC	0.143043
GCG	0.147543
ATA	0.152526
GGA	0.162638
AGG	0.162889
TGG	0.16504
CCC	0.167095
CGC	0.17325
GGG	0.174375
CGG	0.180491
CGA	0.198778
CCG	0.227965
