# Supplementary material for: Enrichment of rare codons at 5' ends of genes is a spandrel caused by evolutionary sequence turnover and does not improve translation
Source: eLife. 2024 Jul 15;12:RP89656. doi: 10.7554/eLife.89656 (PMC11249729; doi:10.7554/eLife.89656)
Supplement: Supplementary file 2. — See attached Excel Spreadsheet. [file elife-89656-supp2.xlsx]

## Sheet: First 40
Condition	mean(first 40 RRT)	mean(rest RRT)	Difference	mean(log2(first 40 RRT/rest RRT))	t.test (first 40 vs rest)	wilcox p-value(first 40 vs rest)	% difference wildtype vs experimental
wildtype	1.0332	1.0222	0.011	0.014022	2.7017e-28	2.7935e-27	0
ATG-neutralized	1.0361	1.0267	0.0094	0.011757	4.4791e-21	5.2218e-20	16.1532
Neutralized ATG, TTG, ATA, and ATT	1.0404	1.0338	0.0066	0.0078006	6.6636e-13	1.0128e-11	44.3688
every gene except mito or ER	1.0274	1.0157	0.0117	0.015178	1.3608e-20	6.2534e-19	0
mitochondrial+ER genes	1.0367	1.0141	0.0226	0.030222	1.2211e-13	1.1018e-13	-99.1171

## Sheet: Last 40
Condition	mean(last 40 RRT)	mean(rest RRT)	mean(log2(last 40 RRT/rest RRT))	t.test(last 40 vs rest)	p-value(last 40 vs rest)	% difference wildtype vs experimental
wildtype	1.024	1.0231	0.00011179	0.35626	0.17647	0
ATG-neutralized	1.0284	1.0274	0.000289	0.29581	0.23703	-158.52
Neutralized ATG, TTG, ATA, and ATT	1.0352	1.0342	0.00044216	0.24244	0.39404	-295.527
every gene except mito or ER	1.019	1.0166	0.002101	0.055756	0.6851	0
mitochondrial+ER genes	1.0123	1.0165	-0.006825	0.11839	0.014113	424.845

## Sheet: Last 50
Condition	mean(last 50 RRT)	mean(rest RRT)	mean(log2(last 50 RRT/rest RRT))	t.test p-value(last 50 vs rest)	wilcox p-value(last 50 vs rest)
wildtype	1.0243	1.0232	0.00080212	0.20899	0.77432

## Sheet: Last 100
Condition	mean(last 100 RRT)	mean(rest RRT)	mean(log2(last 100 RRT/rest RRT))	t.test p-value(last 100 vs rest)	wilcox p-value(last 100 vs rest)
wildtype	1.0246	1.0227	0.0028699	0.040235	0.027783

## Sheet: Last 125
Condition	mean(last 125 RRT)	mean(rest RRT)	mean(log2(last 125 RRT/rest RRT))	t.test p-value(last 125 vs rest)	wilcox p-value(last 125 vs rest)
wildtype	1.0245	1.0227	0.0026071	0.049559	0.0064566
